# Supplementary material for: Effects of a Mindfulness Meditation App on Subjective Well-Being: Active Randomized Controlled Trial and Experience Sampling Study
Source: PubMed Central journal article supplement (PMC6329416; doi:10.2196/10844), 2019-01-08

Multimedia Appendix 2. Screenshots of 2048 cognitive training control condition.

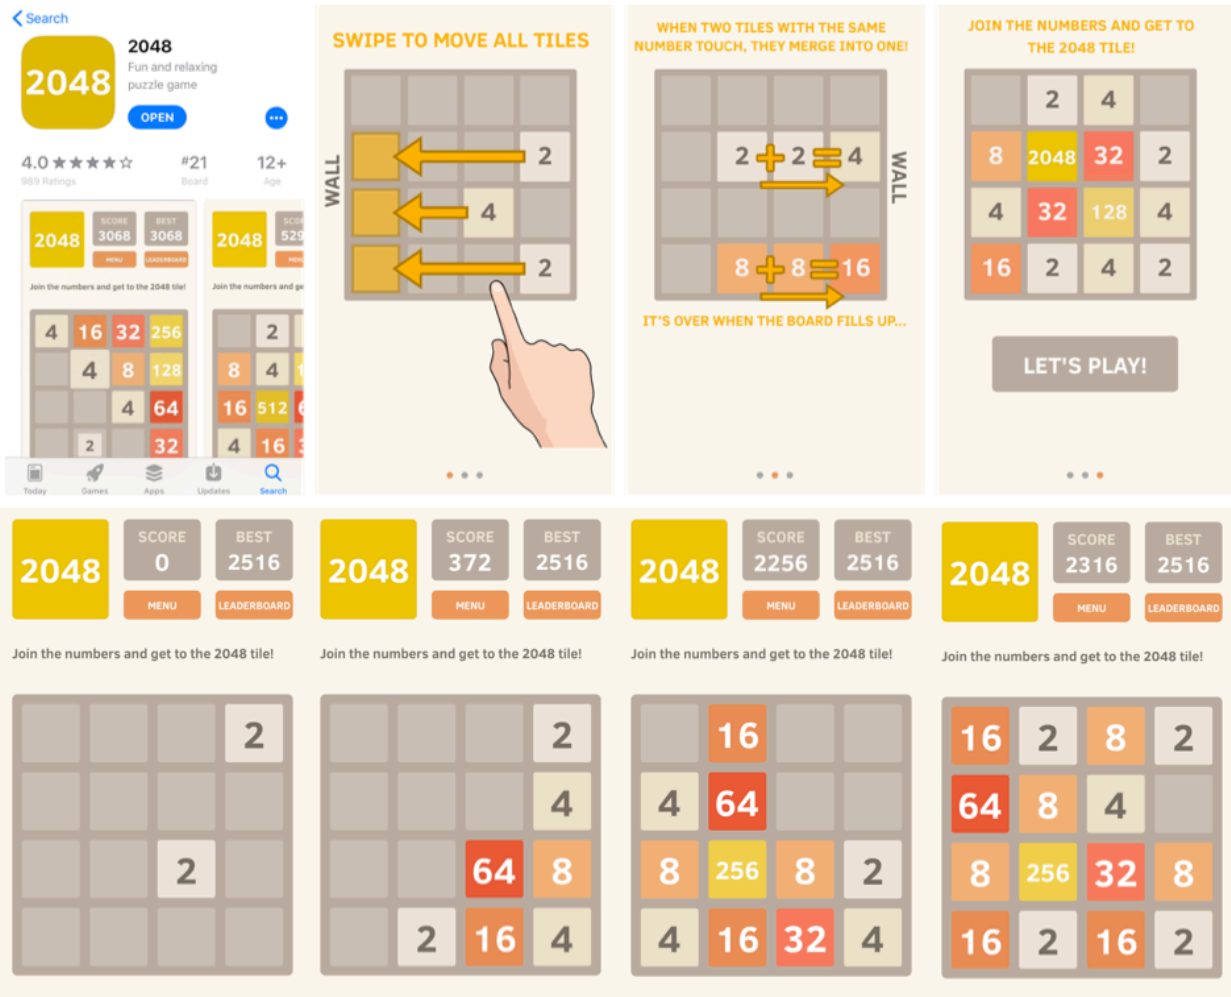

Supplement: mental_v6i1e10844_app2.pdf [file mental_v6i1e10844_app2.pdf]
