# Supplementary material for: Effects of a Mindfulness Meditation App on Subjective Well-Being: Active Randomized Controlled Trial and Experience Sampling Study
Source: PubMed Central journal article supplement (PMC6329416; doi:10.2196/10844), 2019-01-08

Multimedia Appendix 6. Scree plot of Horn's Parallel Analysis of Principal Components used to determine the appropriate factor solution for the exploratory factor analysis.

Scree Plot of Eigen Values and Factors Retained

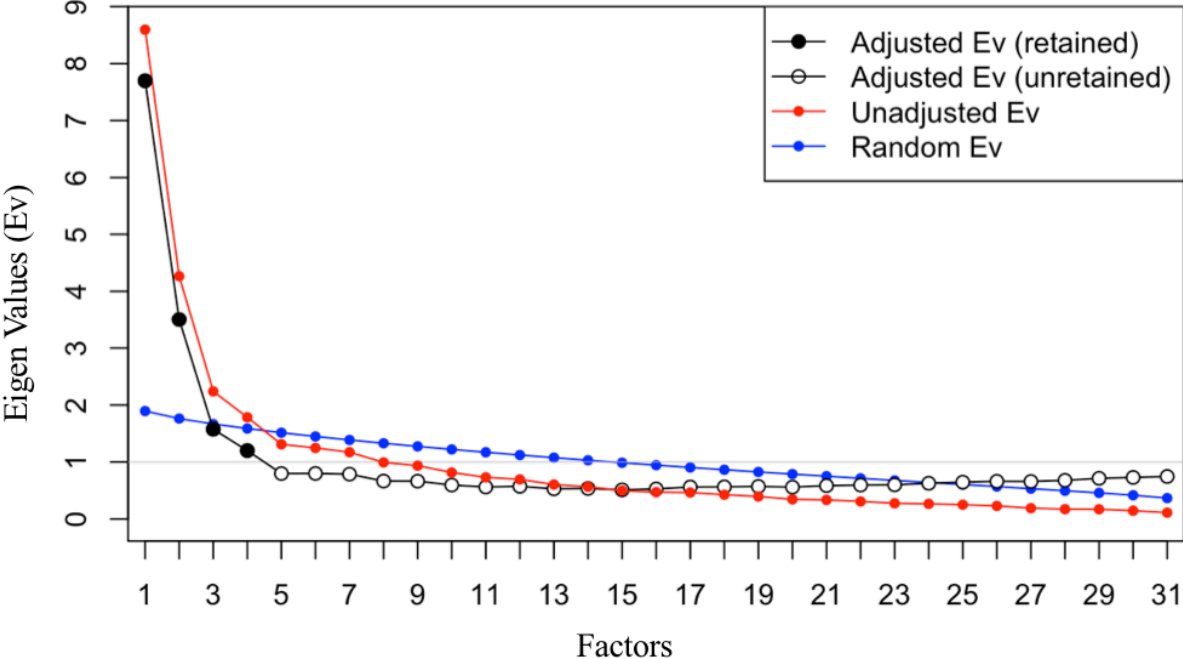

Supplement: mental_v6i1e10844_app6.pdf [file mental_v6i1e10844_app6.pdf]
